# Supplementary material for: Apoptosis Pathways Triggered by a Potent Antiproliferative Hybrid Chalcone on Human Melanoma Cells
Source: MDPI journal article supplement (doi:10.3390/ijms222413462), 2021-12-15
Supplement: s1 [file s1]

## Supplementary Materials

**Figure S1.** HY-CHAL induced caspase cascade in MEL-HO cells.

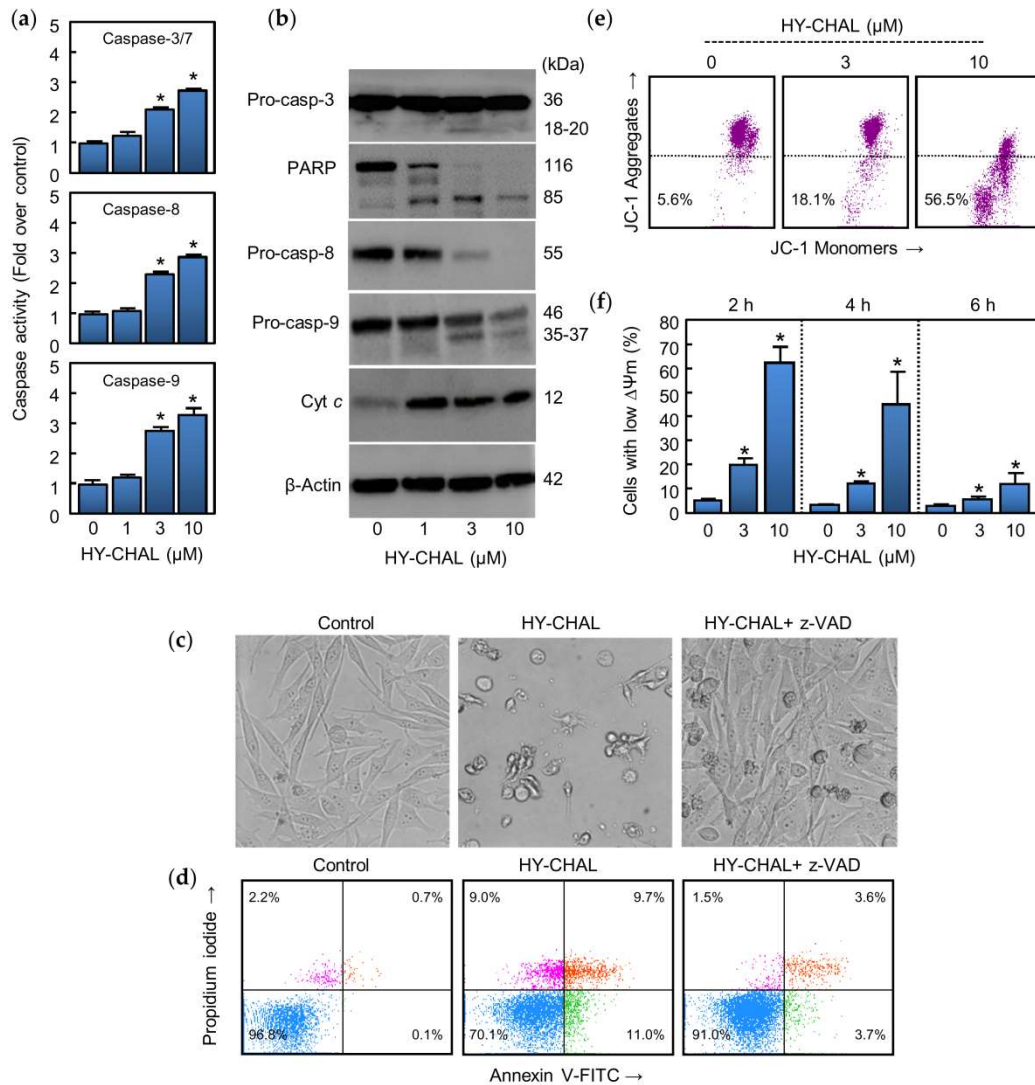

**Figure S1.** HY-CHAL induced caspase cascade in MEL-HO cells. (a) Cells were treated with the specified concentrations of HY-CHAL, harvested at 24 h and total cell lysates were assayed for caspase-3/7, -8, and -9 activities. Results are expressed as factorial increases in caspase activity compared with the control. Values represent means  $\pm$  SE of two independent experiments each performed in triplicate; (b) Cells were treated as in (a) and whole cell lysates or cytosolic fractions (in the case of cytochrome c) were analyzed by immunoblotting.  $\beta$ -Actin was used as a loading control; (c) Cells were pretreated with 100  $\mu$ M z-VAD-fmk for 1 h and then incubated in the absence or in the presence of 3  $\mu$ M HY-CHAL for 24 h and images were obtained with an inverted phase-contrast microscope; (d) Cells were treated as in (c) and analyzed by flow cytometry after staining with annexin V-FITC and propidium iodide; (e) Cells were incubated with the indicated concentrations of HY-CHAL for 2 h and  $\Delta\Psi_m$  analyzed by flow cytometry after staining with the JC-1 probe; (f) Cells were incubated in control conditions or in the presence of the indicated concentrations of HY-CHAL for the specified times, and the percentage of cells with reduced  $\Delta\Psi_m$  was quantified by flow cytometry using JC-1. \* Indicates  $p < 0.05$  for comparison with untreated control.

## Whole Western blots. Uncropped western blots

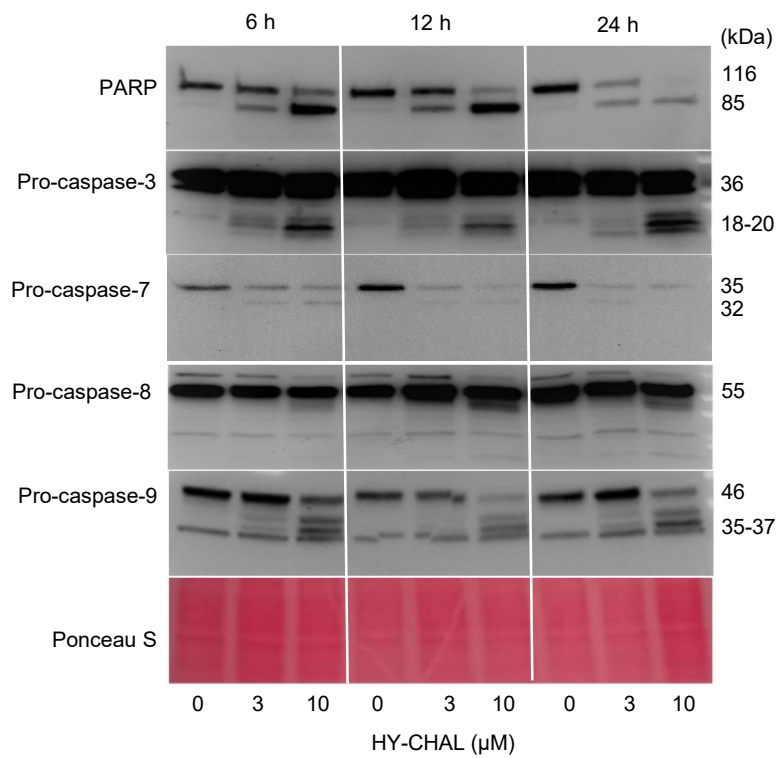

PARP

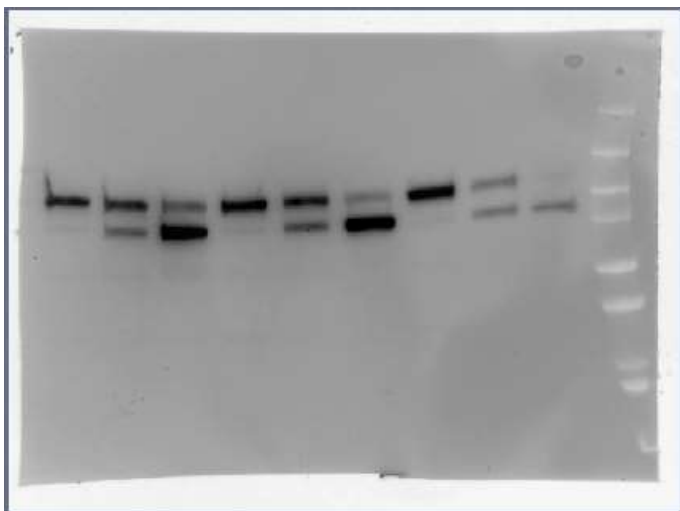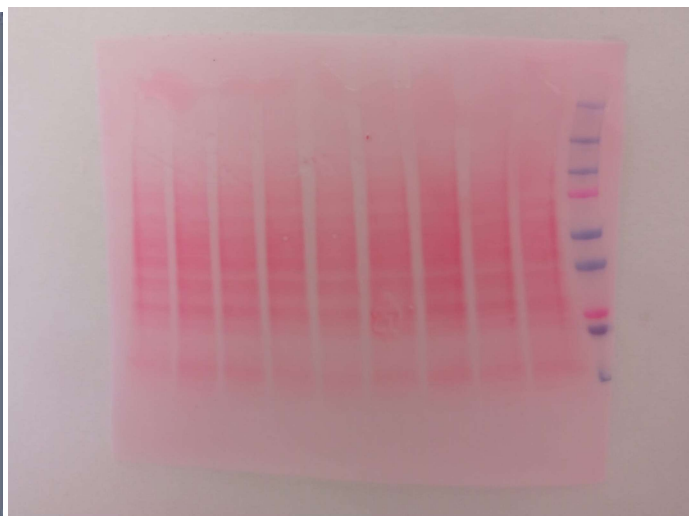

Pro-caspase-3

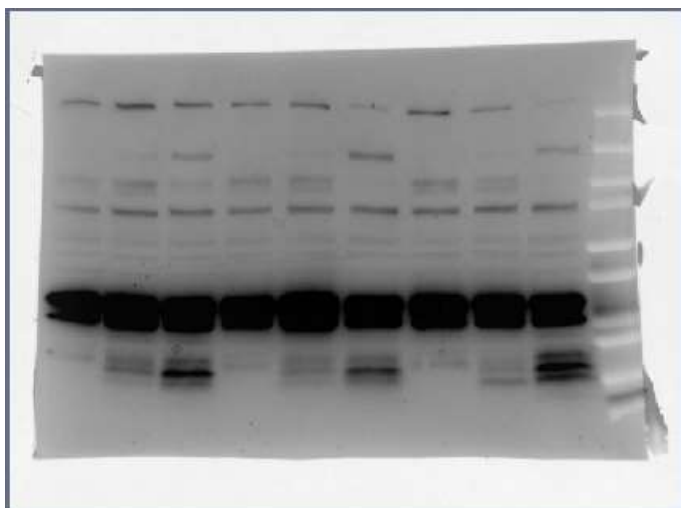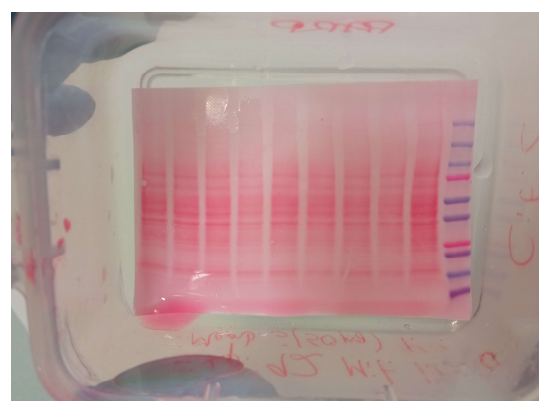

Pro-caspase-7

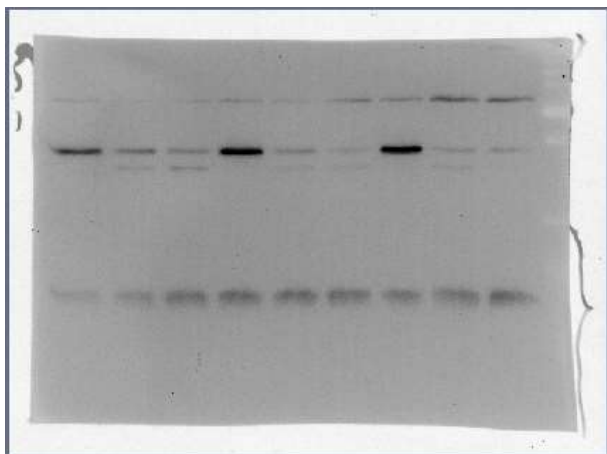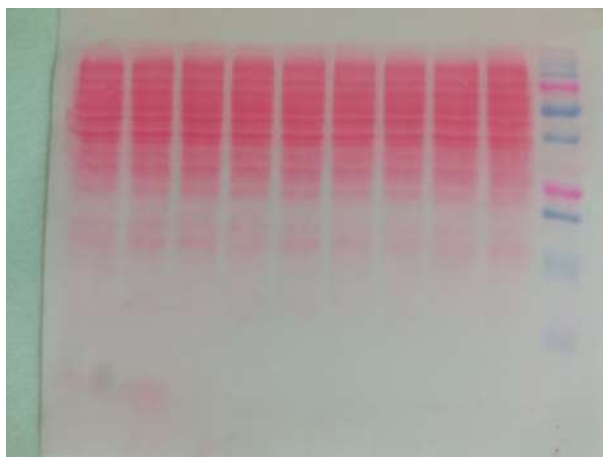

Pro-caspase-8

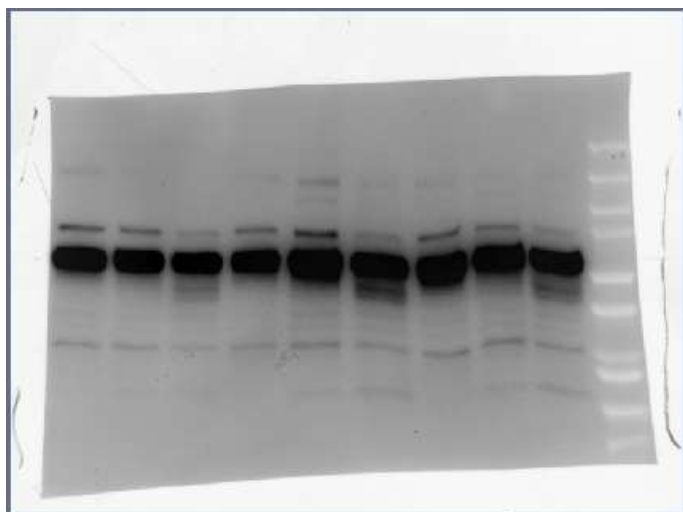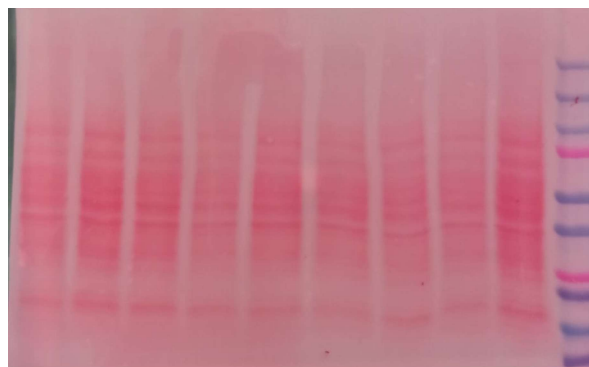

Pro-caspase-9

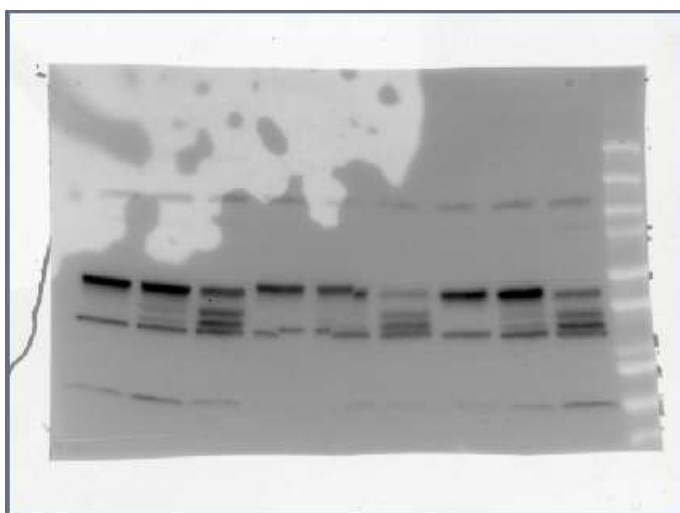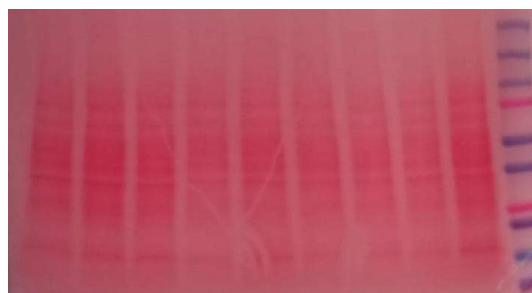

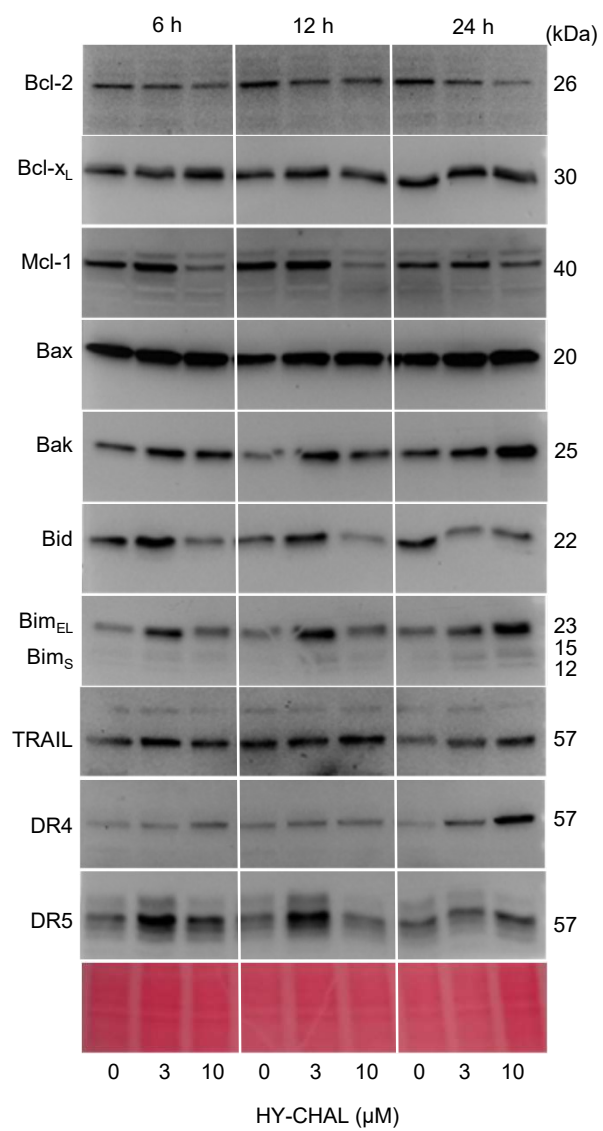

Bcl-2

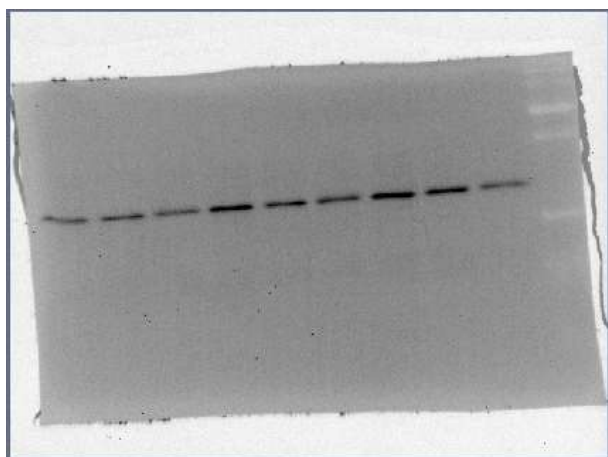

Bcl-x<sub>L</sub>

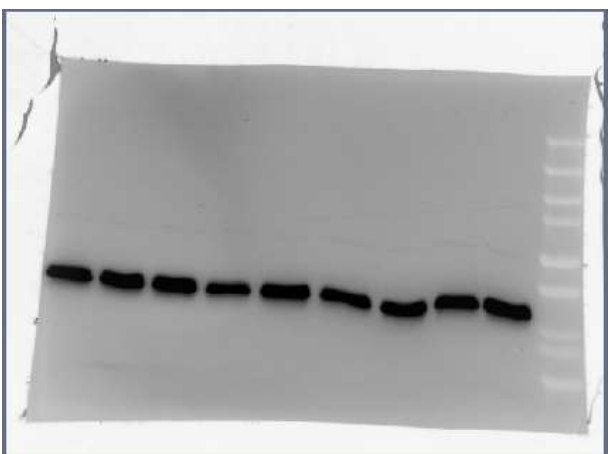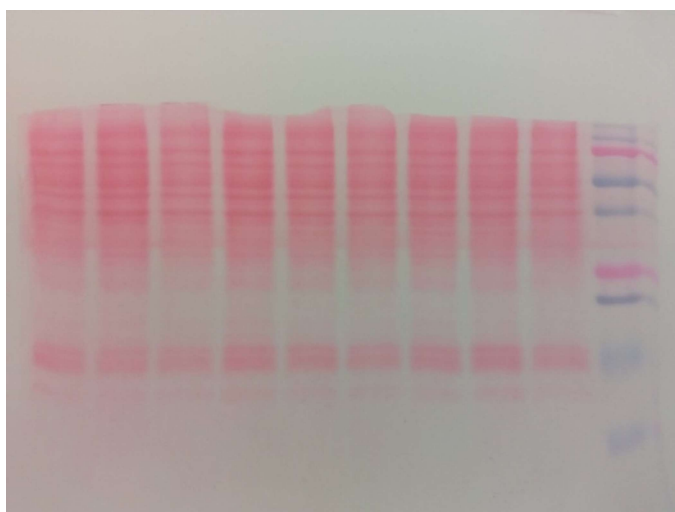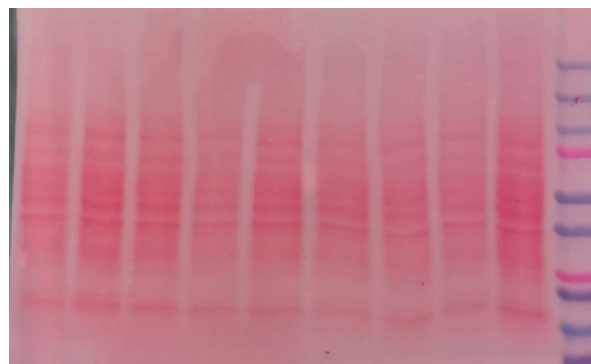

Mcl-1

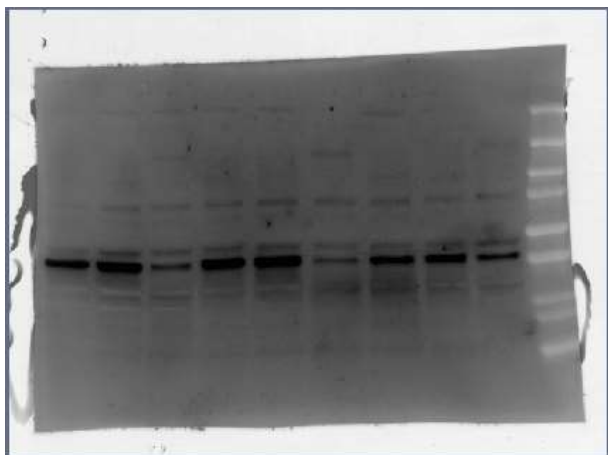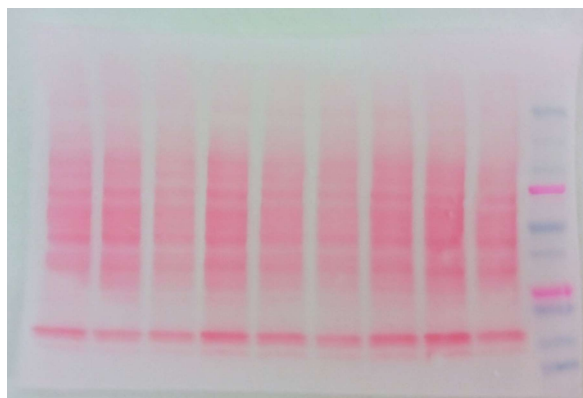

Bax

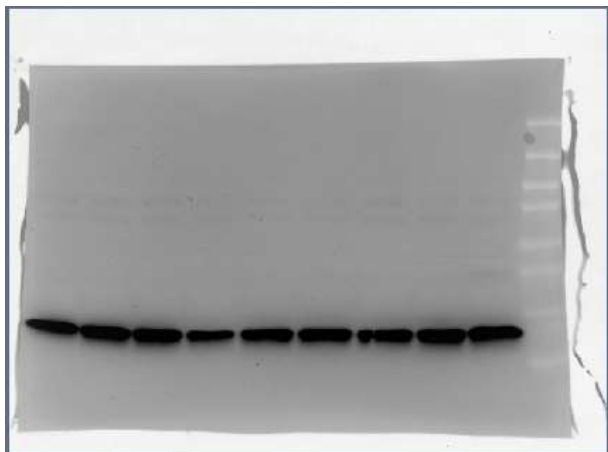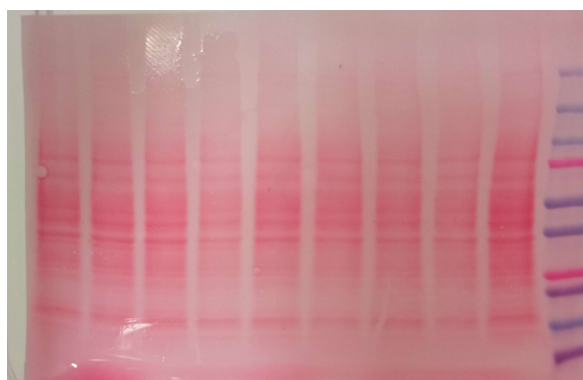

Bak

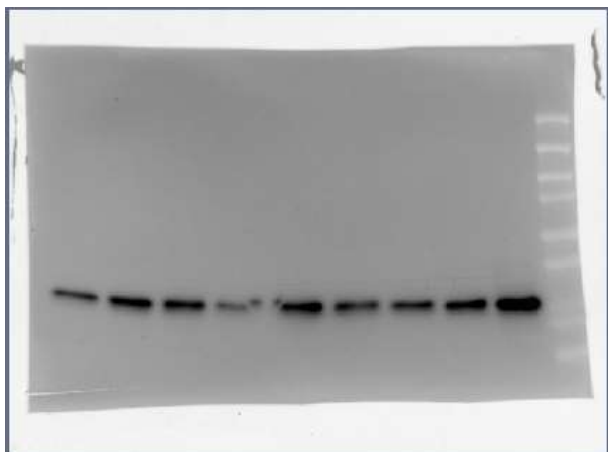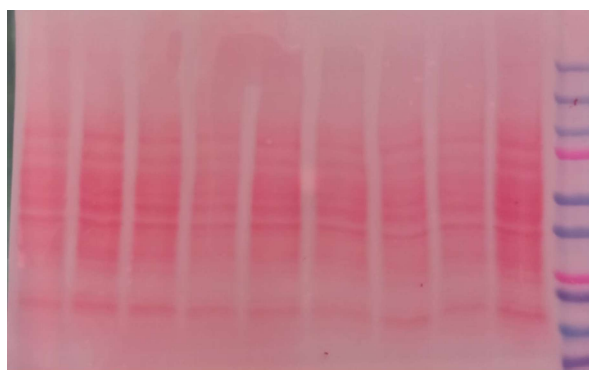

Bid

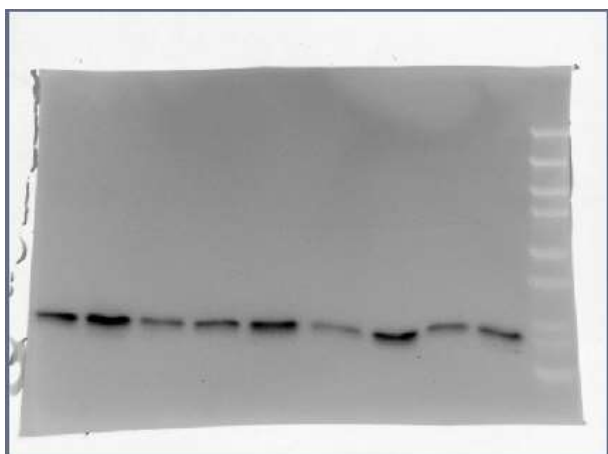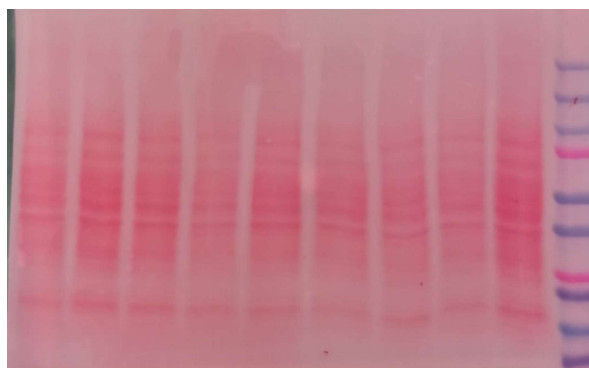

Bim<sub>EL</sub>  
Bim<sub>S</sub>

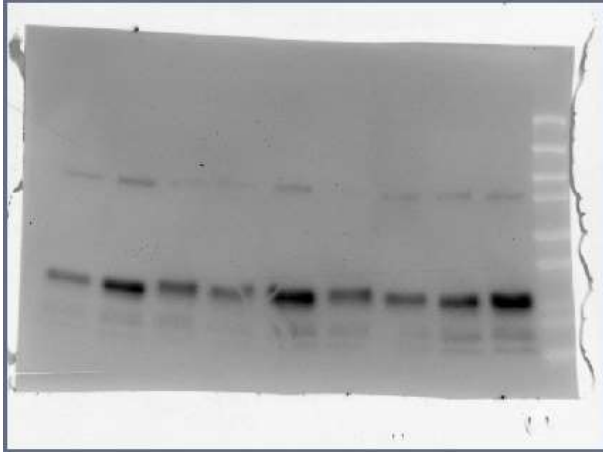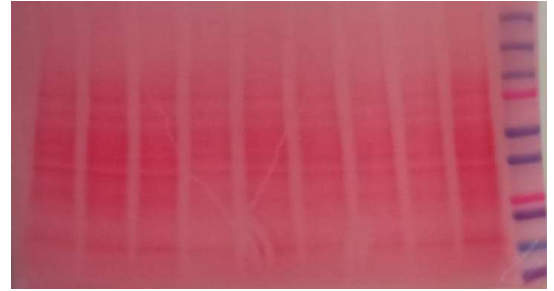

TRAIL

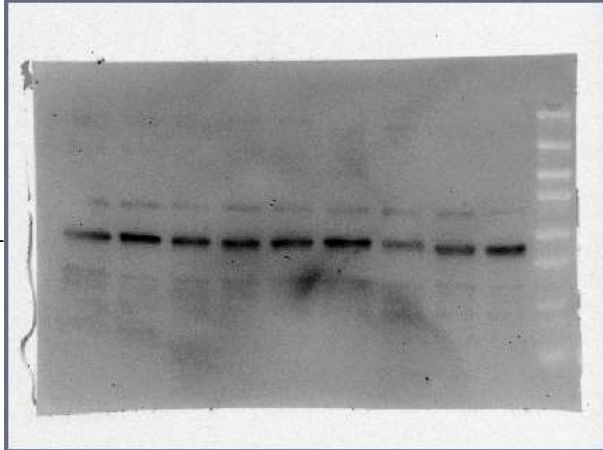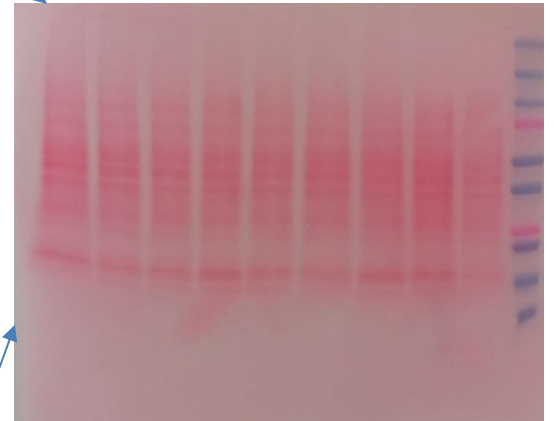

DR4

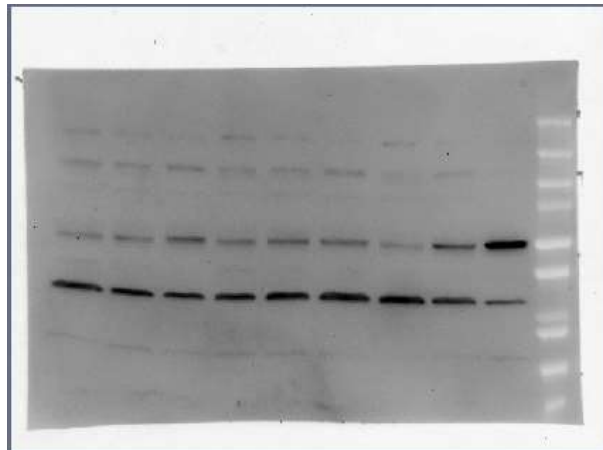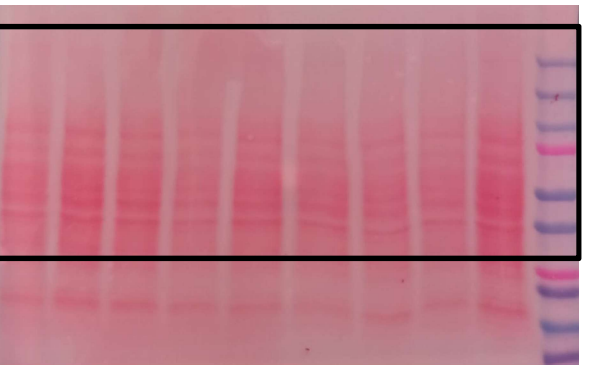

DR5

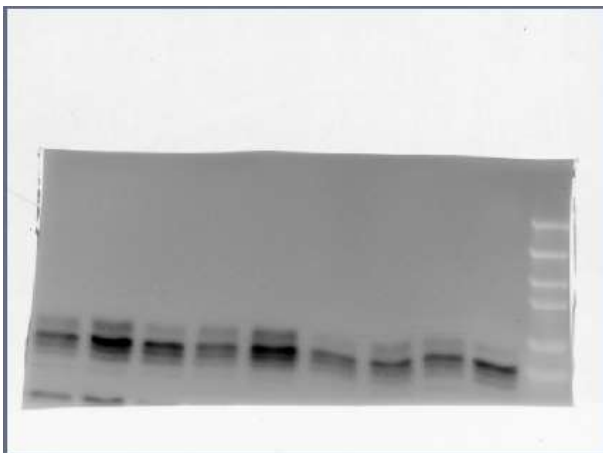

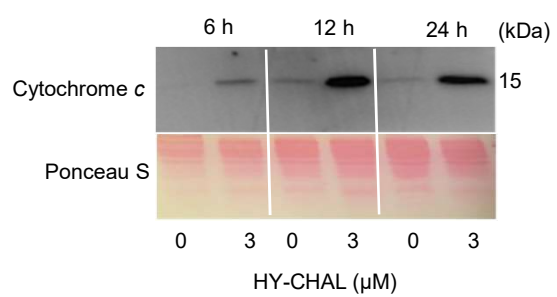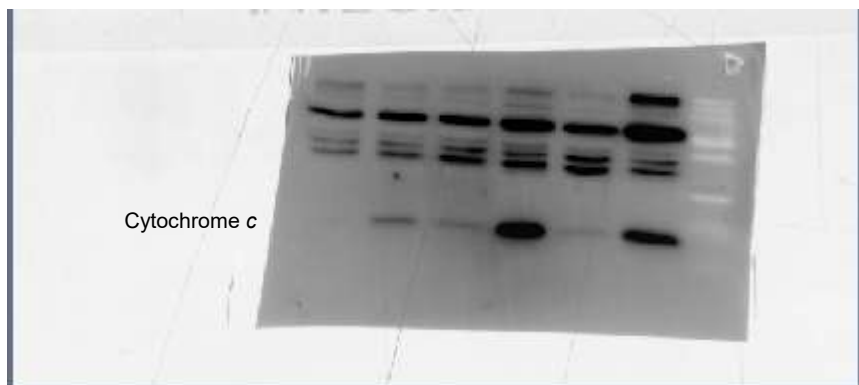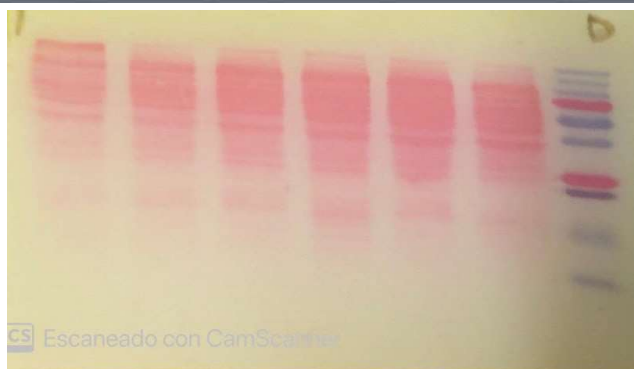

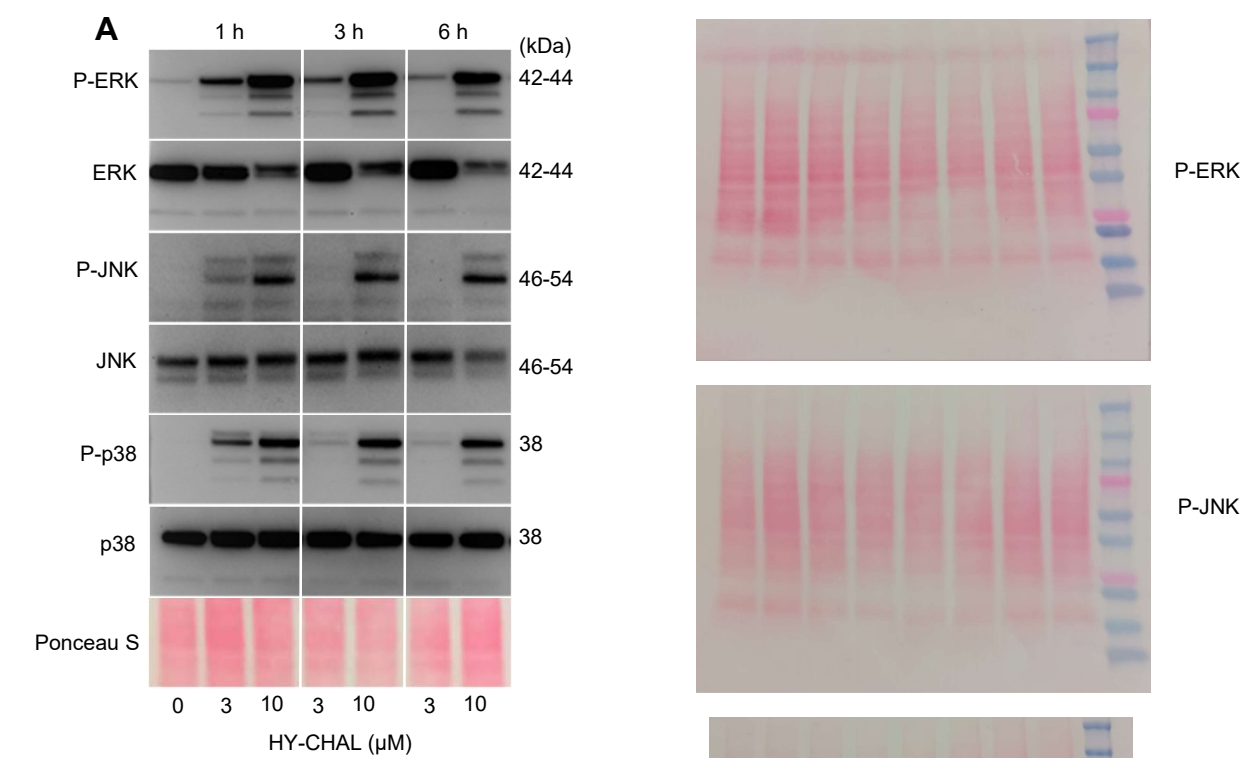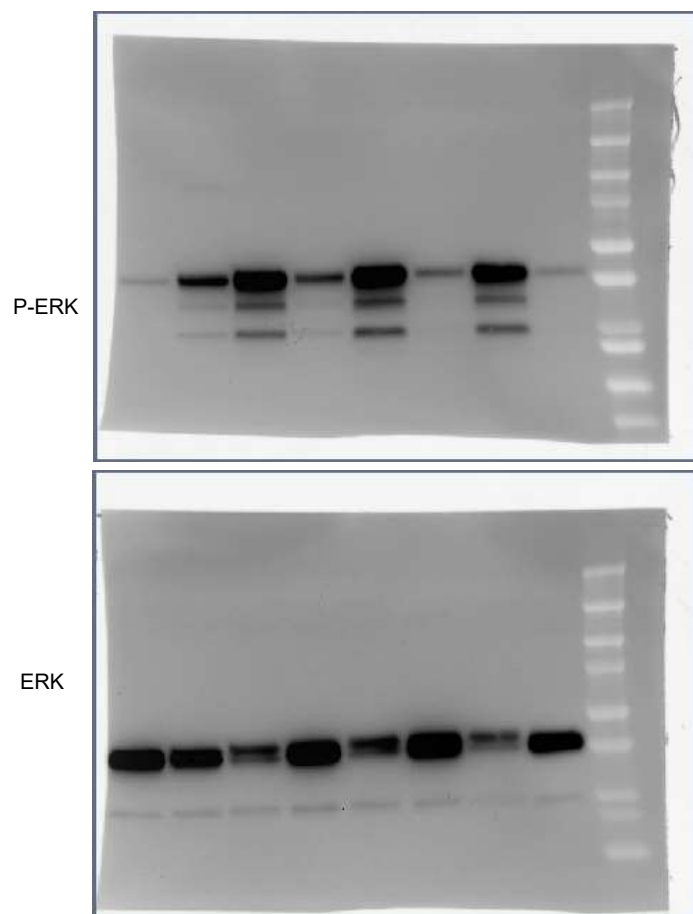

Last line, TPA, is not included in Figure 5a.

P-JNK

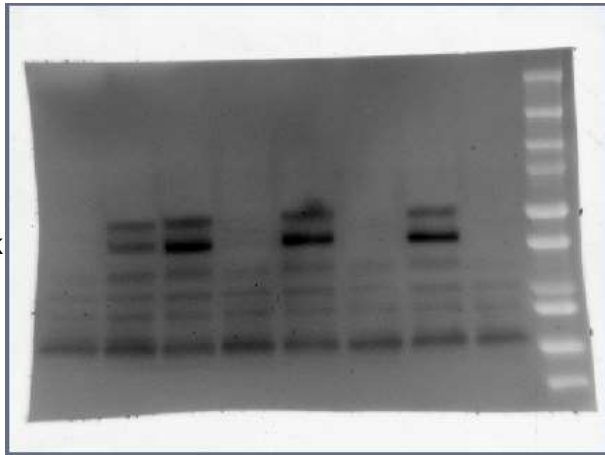

Last line, anisomycin, is not included in Figure 5a.

JNK

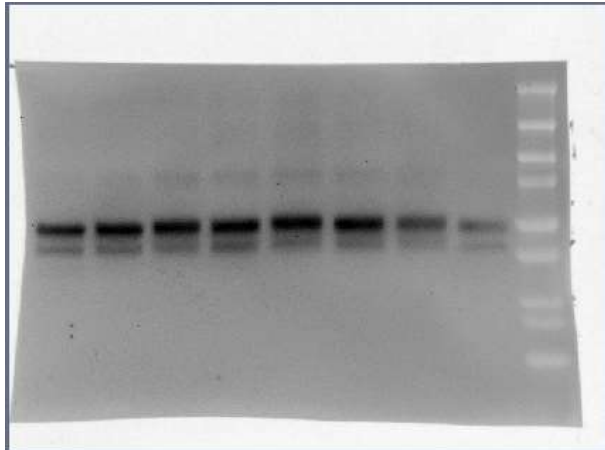

Last line, anisomycin, is not included in Figure 5a.

P-p38

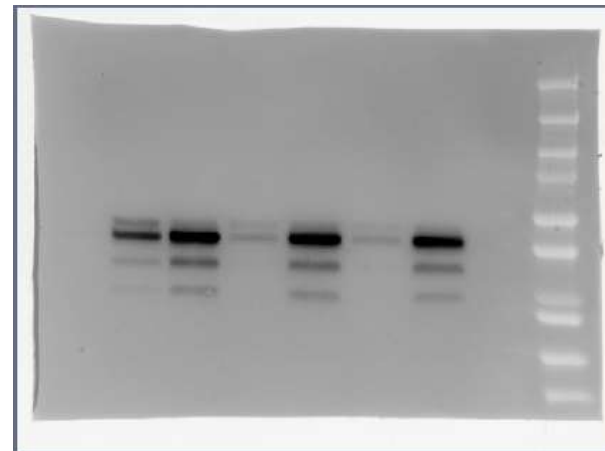

Last line, anisomycin, is not included in Figure 5a.

p38

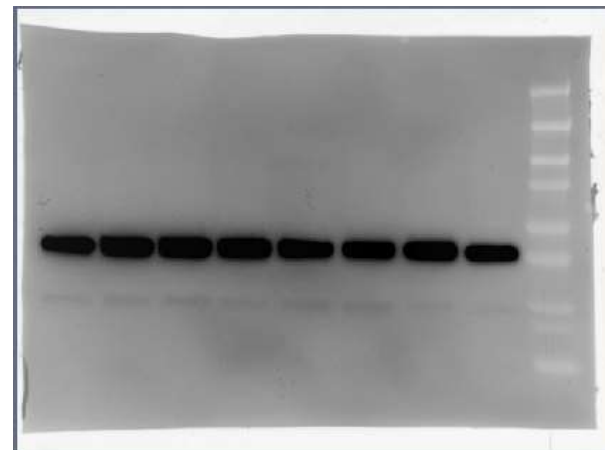

Last line, anisomycin, is not included in Figure 5a.

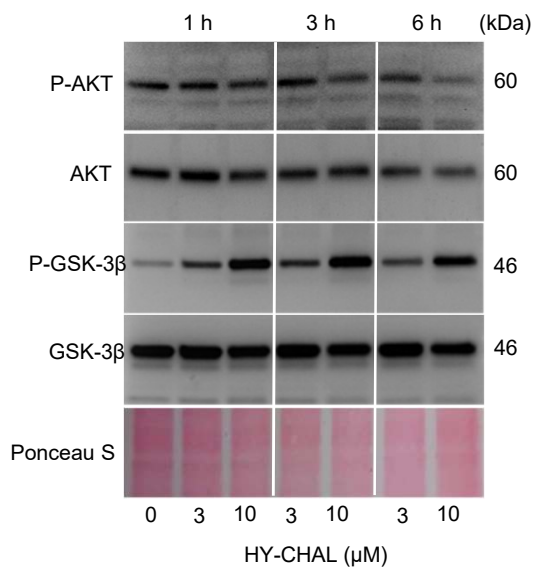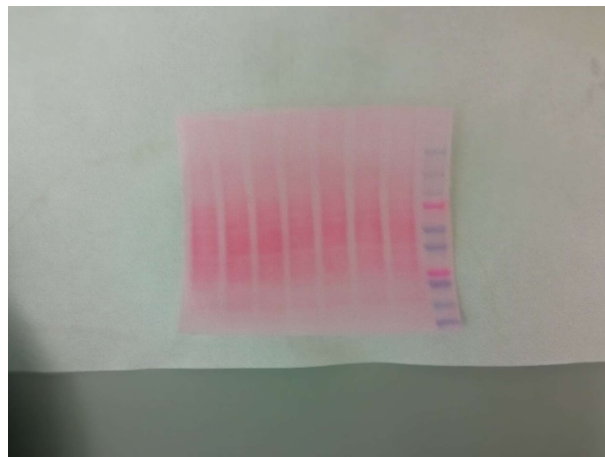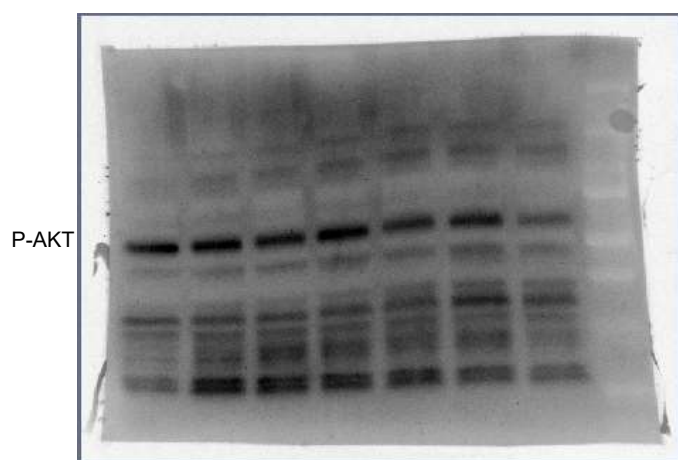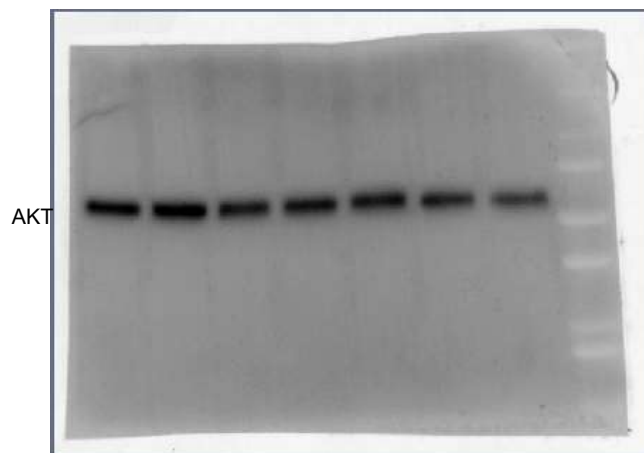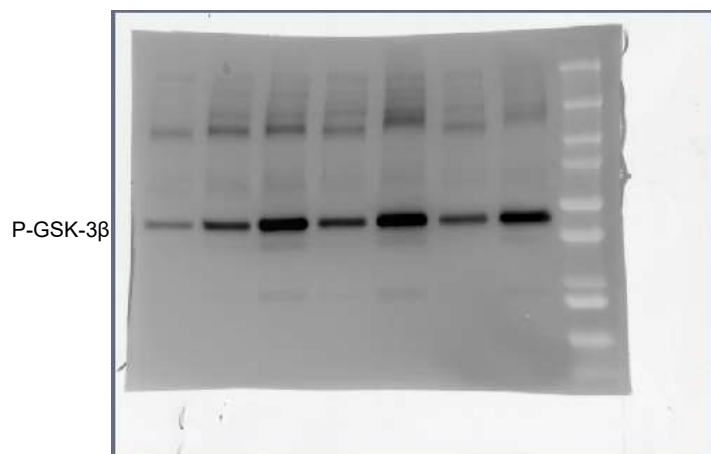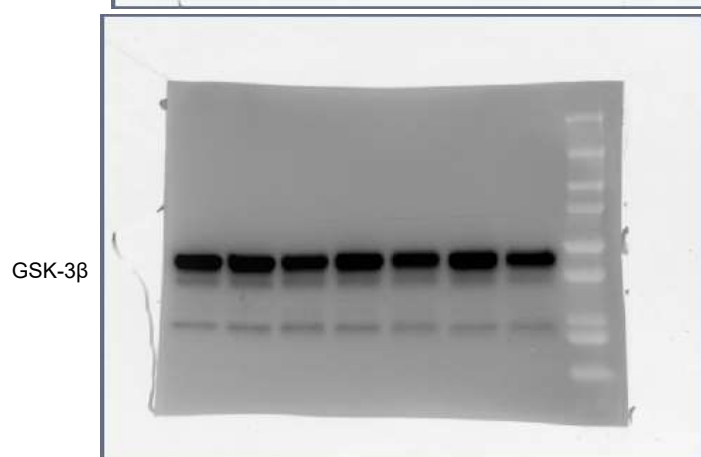

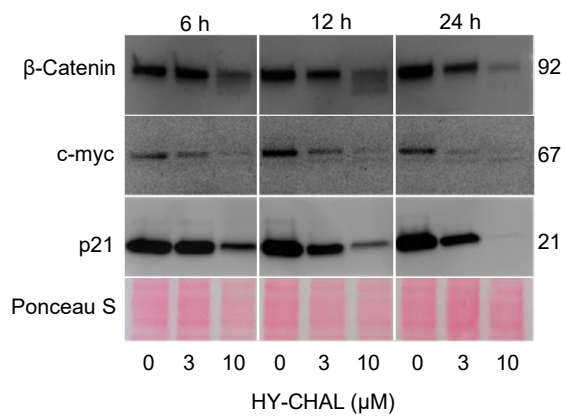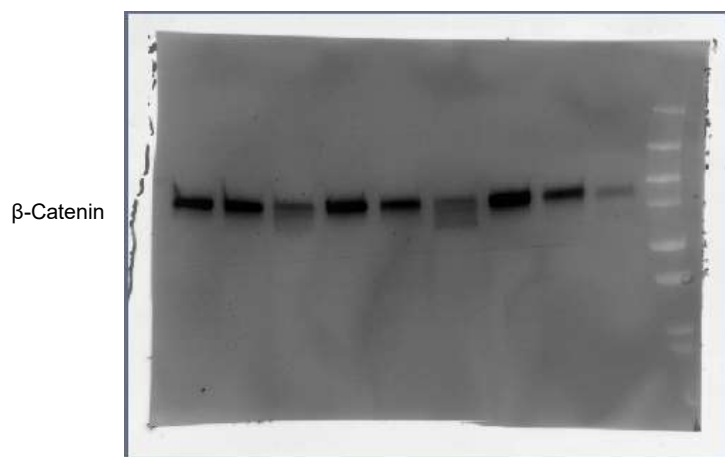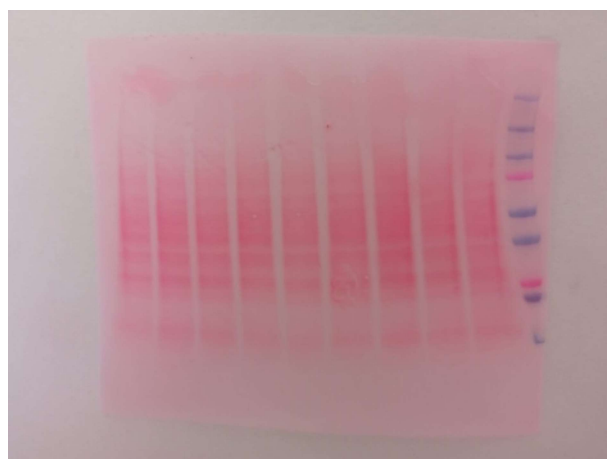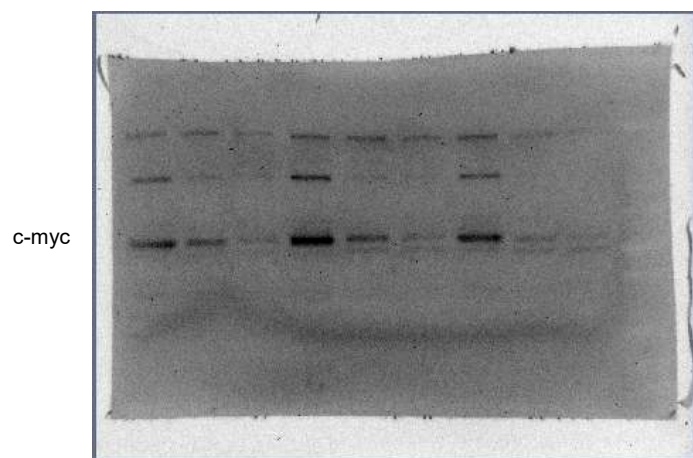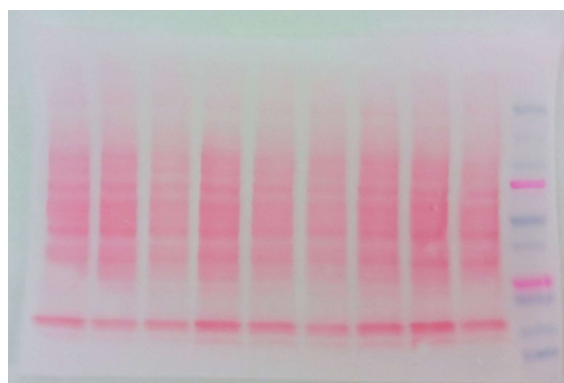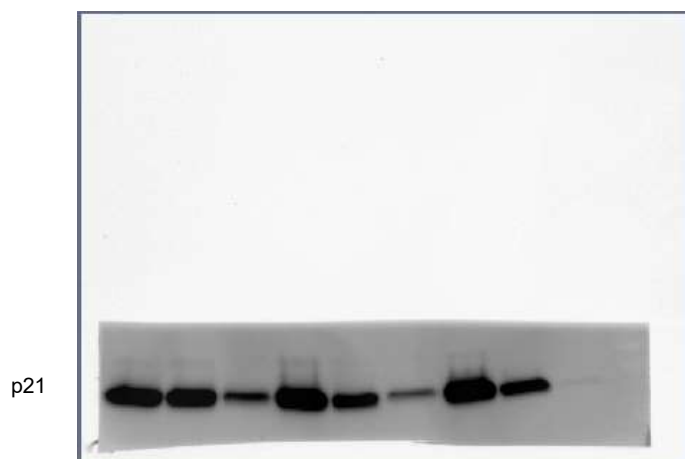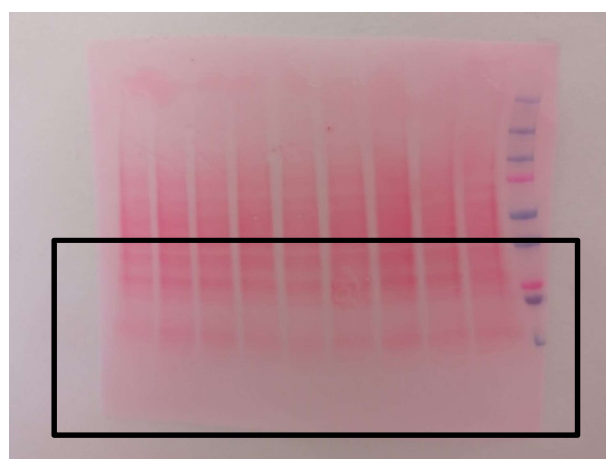

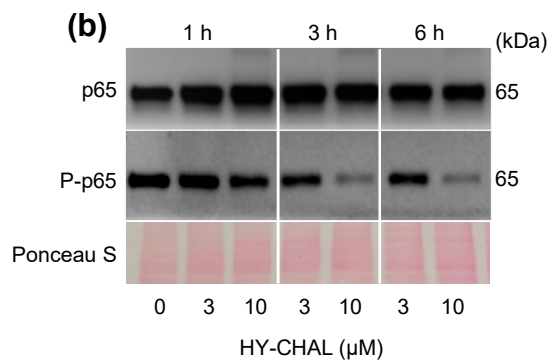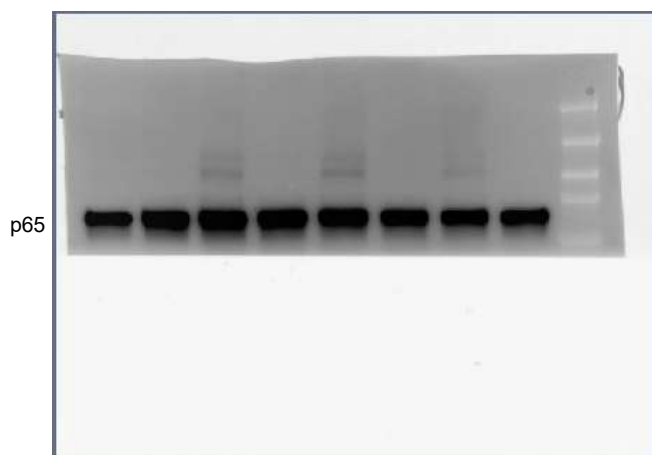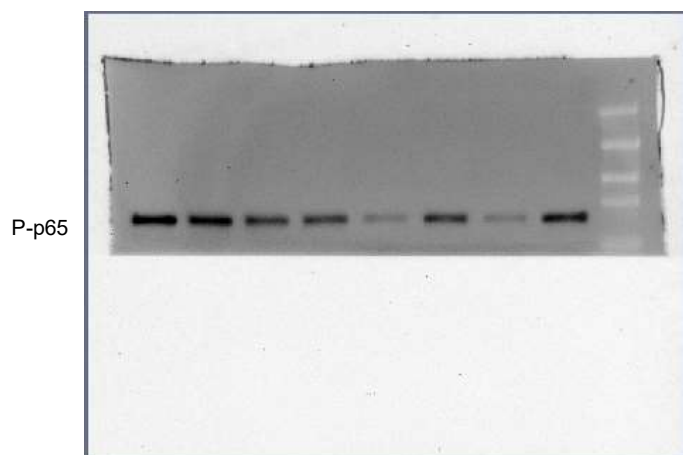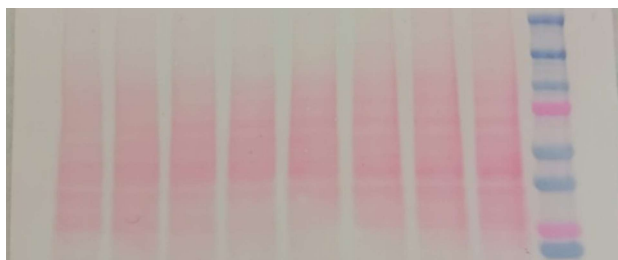

Last line (anisomycin) is not included.in Figure 6b.

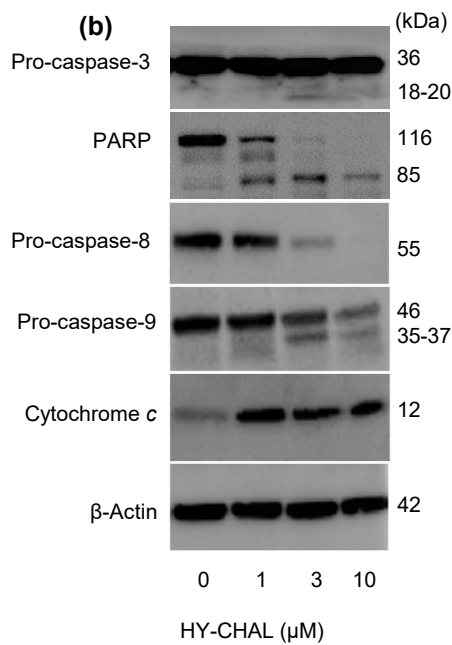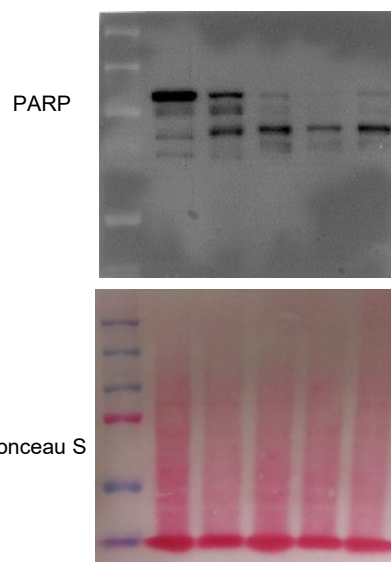

Last line is not included.in Figure S1b.  
Ponceau S staining is not included.

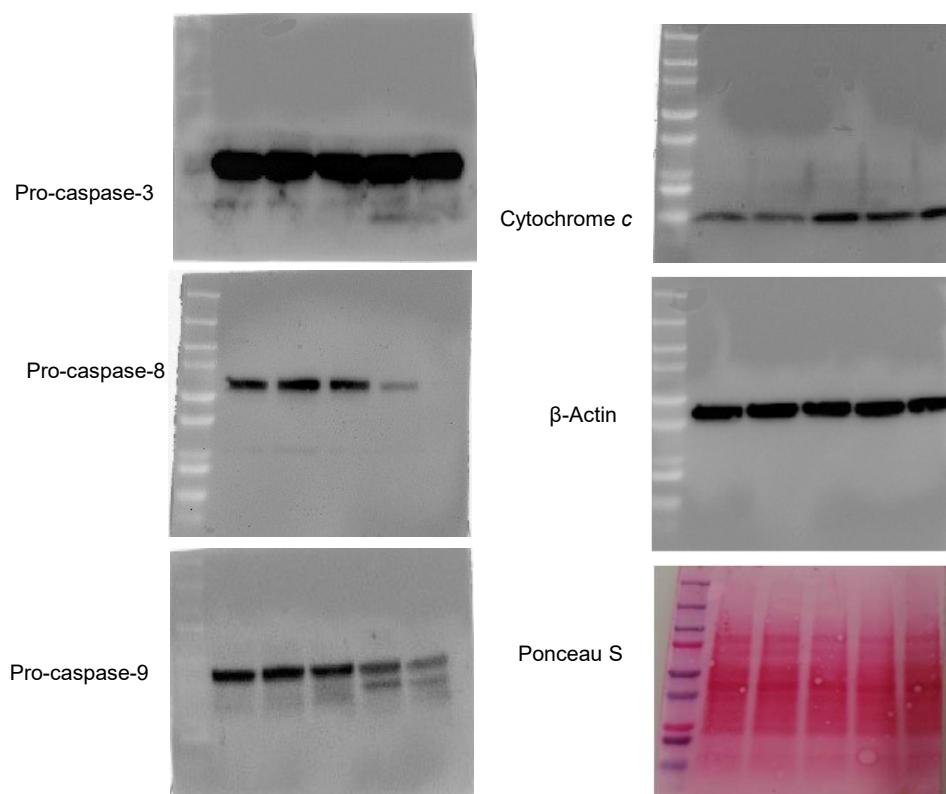

First line (control, equal to line 2) is not included in Figure S1b.  
Ponceau S staining is not included.
